# Supplementary material
Source: Springer Nature journal article supplement (https://www.springermedizin.de/resource/supplementary/12958_2008_458_MOESM5_ESM.pdf/9567942)

A10-85

Gc-6spg

Gc-5spg

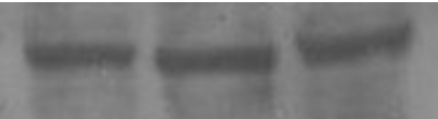

Supplement: MOESM5 [file 9567942]
